# Supplementary material for: Monitoring of Patients on Second-Generation Antipsychotics: A National Survey of Child Psychiatrists
Source: Atypon-hosted journal article supplement (doi:10.1176/appi.ps.201500553), 2017-04-17
Supplement: appi.ps.201500553.ds001.pdf [file appi.ps.201500553.ds001.pdf]

(Online Appendix Only) Table 1: Steps to Adherence in the “awareness-to-adherence” model

| Steps to Adherence | Question in Survey                                                                                                                                                                                                                                                                                                | Definition                                                                                                                                                                                                                                                                                                                                                                                                                                                                                                                                                                                      |
|--------------------|-------------------------------------------------------------------------------------------------------------------------------------------------------------------------------------------------------------------------------------------------------------------------------------------------------------------|-------------------------------------------------------------------------------------------------------------------------------------------------------------------------------------------------------------------------------------------------------------------------------------------------------------------------------------------------------------------------------------------------------------------------------------------------------------------------------------------------------------------------------------------------------------------------------------------------|
| Awareness          | “How much have you heard or read about the recommendation to ...?” This question was based on a 5-point Likert-type scale ranging from “nothing at all” to “a lot.”                                                                                                                                               | Physicians were classified as aware if they had heard/read “some,” “more than some,” or “a lot.”                                                                                                                                                                                                                                                                                                                                                                                                                                                                                                |
| Agreement          | “Do you agree with recommendation to monitor ...?” Yes/No.                                                                                                                                                                                                                                                        | Physicians who endorsed yes were classified as those who agree.                                                                                                                                                                                                                                                                                                                                                                                                                                                                                                                                 |
| Adoption           | “At what points in time are you actually monitoring the following relative to when you start a patient on an atypical antipsychotic (check all that apply and if one time is not exactly right check the closest)?” Options to check were: not at all, baseline, 4 wks, 8 wks, 12wks, 6 months, 9 months, 1 year. | <p>Adopters were defined as those who monitored their patients consistent with the national guidelines.</p> <ul style="list-style-type: none"> <li>○ Fasting blood glucose adopters were defined as those monitoring at baseline, 12 wks and 1 year or more frequently.</li> <li>○ Fasting lipid adopters were defined as those monitoring at baseline and 12 wks or more frequently.</li> <li>○ BMI adopters were defined at baseline, 4 wks, 8 wks, 12 wks and then quarterly.</li> <li>○ AIMS adopters were defined as those who monitored at baseline and at 2+ other intervals.</li> </ul> |
| Adherence          | “The following questions pertain to the use of atypical antipsychotics in children and adolescents: Please estimate the percentage of patients who you are regularly monitoring ...” Options to endorse were 0%, 1-25%, 26-50%, 51-75% or 76 -100%.                                                               | A respondent was considered adherent if a guideline was practiced for >75% of their patients at the specific intervals recommended by the guidelines (6, 15).                                                                                                                                                                                                                                                                                                                                                                                                                                   |

wks = weeks

(Online Appendix Only) Table 2 Demographic characteristics of child psychiatrists responding to a survey about monitoring of second generation antipsychotics in children and adolescents

| <b>Characteristic</b>                             | <b>N (1314)</b> | <b>Percent</b> |
|---------------------------------------------------|-----------------|----------------|
| <b>Gender</b>                                     |                 |                |
| Male                                              | 654             | 50%            |
| Female                                            | 660             | 50%            |
| <b>Years Practicing (excluding training)</b>      |                 |                |
| 0-10                                              | 523             | 40%            |
| 11-20                                             | 330             | 25%            |
| 21-30                                             | 283             | 22%            |
| > 30                                              | 178             | 14%            |
| <b>Practice Location</b>                          |                 |                |
| Northeast                                         | 466             | 36%            |
| Southeast                                         | 240             | 18%            |
| Midwest                                           | 242             | 18%            |
| Northwest                                         | 137             | 10%            |
| Southwest                                         | 229             | 17%            |
| <b>Main Practice Type</b>                         |                 |                |
| Solo Outpatient (Non-Acad.)                       | 298             | 23%            |
| Group Outpatient (Non-Acad.)                      | 194             | 15%            |
| Academic Outpatient                               | 252             | 19%            |
| Community Mental Health                           | 275             | 21%            |
| Inpatient (Non-Acad.)                             | 88              | 7%             |
| Academic Inpatient                                | 53              | 4%             |
| Other (this was variable with write in responses) | 154             | 12%            |

Acad = Academic

(Online Appendix Only) Figure 1. Sequential analysis of percentage of child psychiatrists reporting awareness of, agreement with, adoption of, and adherence to second generation antipsychotic monitoring guidelines.

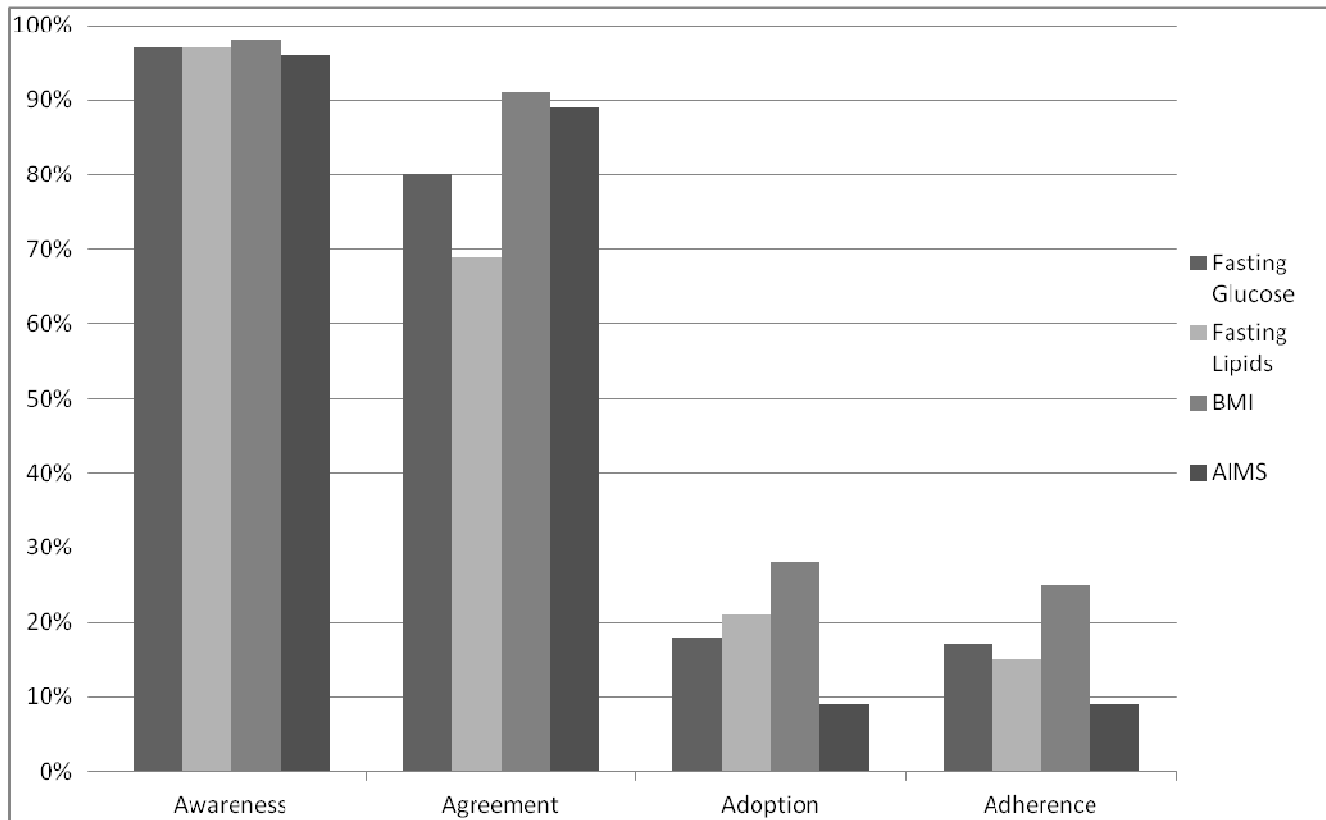

BMI = Body Mass Index; AIMS = Abnormal Involuntary Movements
